# Supplementary material
Source: publisher site journal article supplement (https://www.degruyterbrill.com/publication/journal_key/AGPH/downloadAsset/AGPH_AGPh_Instructions_for_Authors.pdf)
Supplement: Supplementary file 1 [file AGPH_AGPh_Instructions_for_Authors.pdf]

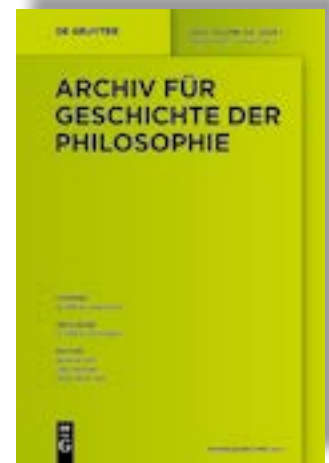

# Archiv für Geschichte der Philosophie

## Table of Content

|                                                            |          |
|------------------------------------------------------------|----------|
| <b>Scope and general policies</b>                          | <b>2</b> |
| Scope                                                      | 2        |
| Article (manuscript) categories                            | 2        |
| <b>Peer review, turnaround times and preprint policies</b> | <b>2</b> |
| Peer review information                                    | 2        |
| Turnaround time                                            | 2        |
| Issue based publication                                    | 2        |
| Appeals                                                    | 2        |
| Preprint policy                                            | 2        |
| Inclusive language policy                                  | 2        |
| <b>Submission of manuscripts</b>                           | <b>3</b> |
| ORCID                                                      | 3        |
| Submission declaration and verification                    | 3        |
| Scientific misconduct                                      | 3        |
| Research integrity                                         | 3        |
| <b>Post-acceptance</b>                                     | <b>3</b> |
| Galley proofs                                              | 4        |
| Offprints                                                  | 4        |
| Repository policy                                          | 4        |
| Subscription-based and hybrid journals                     | 4        |
| Copyright                                                  | 4        |
| Open Access in hybrid journals                             | 4        |
| Open Access and Research Gate                              | 4        |
| Article Processing Charges (APCs)                          | 4        |
| <b>Ethical conduct of research</b>                         | <b>5</b> |

## Scope and general policies

### Scope

- Focusing on the Western tradition, *Archiv für Geschichte der Philosophie* publishes outstanding articles in all areas of philosophy from antiquity up to the twentieth century. The journal fosters original research on a wide range of topics without prioritizing particular methods, approaches, or traditions. *Archiv* seeks to expand its scope by including more research on non-Western histories of philosophy and non-canonical figures.
- 4 issues per year, print and online.
- While the journal accepts articles in both English and German, most published articles are in English.

### Article (manuscript) categories

- Article
- Book Review

## Peer review, turnaround times and preprint policies

### Peer review information

*Archiv* is a double-blind journal. Manuscripts are reviewed anonymously by at least two independent reviewers selected by the editors.

The editors reserve the right to reject submitted manuscripts without peer review if they are deemed to lack originality or do not meet the high scholarly standards of the journal in other respects.

### Turnaround time

*Archiv* aspires to inform authors of the peer review decision within 3 months from the submission date. Accepted articles will be published online (preprint) within 6 weeks of acceptance. *Archiv* also aspires to publish accepted articles in one of the printed issues within 1,5 years of acceptance.

### Issue based publication

Articles are first published online as DOI citable articles and are later assigned to an issue with final page numbers.

### Appeals

Manuscripts that have been rejected for publication will be reconsidered only at the discretion of the Editor(s). Authors wishing to request reconsideration of a previously rejected manuscript must do so in written form and submit a rebuttal by e-mail to the journal's editorial office. Authors should provide detailed reasons why they believe the manuscript should be reconsidered. If the rebuttal is accepted, the author will be asked to re-submit the manuscript, or the decision will be reversed.

### Preprint policy

De Gruyter does not consider the following purposes of a paper as pre-publication: publication in the form of a congress abstract, publication as an academic thesis, publication as an electronic preprint on recognized servers such as arXiv, RePEc, bioRxiv, ResearchSquare, etc.

### Inclusive language policy

Inclusive language recognizes diversity, conveys respect for all people, is sensitive to differences and promotes equal opportunities. Content should not make assumptions about readers' beliefs or commitments; should not contain anything that might suggest that one person is superior to another because of age, gender, race, ethnicity, culture, sexual orientation, disability or health condition; and should use inclusive language throughout. Authors should ensure that their writing is free from prejudice, stereotypes, slang, references to the dominant culture and/or cultural assumptions.

We advise the following approach: Aim for gender neutrality by using plural nouns (clinicians, clients, participants) as standard and avoiding "he" or "she", wherever possible. Instead, please use "they". We recommend

avoiding the use of descriptors that refer to personal characteristics such as age, gender, race, ethnicity, culture, sexual orientation, disability or health status unless they are relevant and valid.

## Submission of manuscripts

- Please submit manuscripts exclusively online at: <https://mc.manuscriptcentral.com/agph>

We strongly recommend that the authors register with institutional e-mail addresses, and refrain from using private e-mail addresses. Revised manuscripts must be accompanied by a point-by-point reply to the reviewers' criticisms. Major changes in the revised manuscript must be highlighted in color.

## ORCID

The ORCID (Open Researcher and Contributor ID) is a non-profit, publisher-independent system that is used to uniquely identify academics and their publications. Click [here](#) for detailed information about ORCID. Submitting authors can login with username and password. If the journal uses ScholarOne as submission tool, authors can also login with their ORCID number. Providing an ORCID number for each author is strongly recommended. ORCID numbers should be listed on the title page.

## Submission declaration and verification

For information on plagiarism, please refer to [COPE – Committee of Publication Ethics](#). Submission of a manuscript to a journal implies that the work described has not been published previously, except in the form of an abstract, academic thesis, lecture, or preprint; that it is not under consideration for publication elsewhere (multiple, redundant, concurrent publication); that publication of the work is approved by all authors and tacitly or explicitly by the responsible authorities where the work was carried out; and that, if accepted for publication, it will not be published elsewhere, no matter in which language, without the written consent of the Publisher. Exceptions are listed under Preprint policy.

To exclude potential overlap with prior publication(s), your manuscript may be checked by the plagiarism checker Crossref Similarity Check, ([iThenticate](#)). Previously published material must be referenced appropriately in the manuscript, regardless of whether the material was previously published in a subscription based, hybrid or open access journal, or in another language.

## Scientific misconduct

Only articles that have not been or will not be published elsewhere will be published in the journal, excluding articles that fall under De Gruyter's [Repository Policy](#). Multiple submissions/publications or redundant publications (i.e., republication of data already published by the same authors) will be rejected. If identified after publication, the journal reserves the right to publish a retraction note. In any case, editors will follow COPE's Code of Conduct and implement its advice.

## Research integrity

The authors are responsible for all aspects of the study and will ensure that any questions regarding the accuracy and integrity of any part of the work are adequately investigated and resolved. With submitting your manuscript to *Archiv* the authors declare that they are the sole and intellectual authors of the manuscript, and that no artificial intelligence was involved in drafting the manuscript. We do not accept papers that are generated by Artificial Intelligence (AI) or Machine Learning Tools primarily because such tools cannot take responsibility for the submitted work and therefore cannot be considered as authors. Where such tools or technologies are used as part of the design or methodology of a research study, their use should be clearly described in the Acknowledgments section.

## Post-acceptance

After acceptance, the article will be copyedited by the editorial office of *Archiv*. The copyedited manuscript will be sent to the author for approval before being transferred to production.

### Galley proofs

The corresponding author of an article receives the galley proofs in electronic form to check them for editorial and typesetting accuracy. Corresponding authors receive an e-mail notification ("Check your proof") with a link to the author's page. Here they can download the PDF proof. As soon as the corrections and answers to comments are marked in the PDF file, the author uploads the proof file to the same page and submits it to production.

All instructions for proof corrections, including deadlines, will be given in the e-mail notification to the corresponding author, along with a user guide, providing step-by-step instructions for inserting corrections.

Substantial changes to an article accepted for publication will only be considered with the permission of the Editor or after additional peer review. The responsibility for proofreading lies solely with the authors.

**According to De Gruyter policy, once an article has been accepted, no changes to the author list and article title are allowed (except typos). The De Gruyter production team is instructed to enforce this policy during the production/proof correction process.**

### Offprints

Electronic files of typeset articles in Adobe Acrobat PDF format are provided free of charge. The corresponding author will receive an e-mail notification when the article has been published online along with instructions on how to access the article.

### Repository policy

Policies for sharing published journal articles differ for subscription-based and open access articles.

#### Subscription-based and hybrid journals

Authors may publish their articles in a public repository after an embargo period of 12 months (see De Gruyter's [Sharing Policy](#)). Only the accepted author version of the manuscript, not the PDF version of the published article, can be published:

Immediately

- via their non-commercial personal website, blog or social media channels
- by updating a preprint in arXiv, RePEc, bioRxiv, ResearchSquare, etc. with the version of the accepted manuscript
- as a closed deposit via their research institute or institutional repository for internal institutional purposes or as part of an invitation-only research collaboration workgroup
- directly by providing copies to their students or to research collaborators for their personal use
- for private scholarly sharing as part of an invitation-only work group

After an embargo period of 12 month

- as open deposits to institutional or subject repositories
- to scholarly collaboration networks (SCNs)

### Copyright

Manuscripts submitted to subscription and hybrid journals are accepted on condition of transfer of copyright ([License to Publish](#)) (for U.S. government employees: to the extent transferable) to the publisher. Once the manuscript has been accepted, it may not be published elsewhere without the consent of the copyright holders.

#### Open Access in hybrid journals

The author declares consent to place the article under the Creative Commons license CC-BY 4.0. In this case, the exclusive rights previously granted to the publisher will be converted into non-exclusive rights. The author confirms that they have already acquired all necessary rights for all components of the work in the event of an open access publication. For more information, refer to paragraph 5 in the [License to Publish](#)

#### Open Access and Research Gate

Authors publishing Open Access will see their articles automatically added to their publication pages on [Research Gate](#).

### Article Processing Charges (APCs)

Authors publishing in **hybrid journals** do not have to pay APCs if they do not wish to publish their article open access. After acceptance and before production of an article, authors can decide whether to publish their article

open access. Only if they decide to publish open access, APCs will be charged. All articles are peer-reviewed and accepted for publication based on the quality of their scientific contribution. The decision to publish open access does not affect the peer review process or the acceptance of the article. De Gruyter has [institutional agreements](#) in place that allow authors to publish open access articles at no cost at all – or with a significant discount. For more information on De Gruyter's open access policy, please read our [Open Access Policies](#).

## Ethical conduct of research

**Manuscripts must follow certain ethical guidelines** to be considered for publication. These can be found in the [Publication Ethics and Malpractice Statement](#). Accordingly, **before submitting your manuscript, please make sure that you and your co-authors agree to the applicable requirements**. Furthermore, our [Code of Conduct for Publication Procedures and Ethics](#) defines the responsibility of De Gruyter as a publisher and the Editors we work with, to ensure the legitimacy and quality of our published research. Our principles are based on the guidelines of the [Committee on Publication Ethics \(COPE\)](#).

**Please contact the editor for any further questions:**

Name: Carlo Davia

Email: [agp@degruyter.com](mailto:agp@degruyter.com)
